# Supplementary material
Source: PubMed Central journal article supplement (PMC3914425)
Supplement: NIHMS539065-supplement-1.pdf [file NIHMS539065-supplement-1.pdf]

**Characterizing the Secondary Protein Structure of Black Widow Dragline Silk  
Using Solid-State NMR & X-ray Diffraction**

Janelle E. Jenkins<sup>a</sup>, Sujatha Sampath<sup>a,b</sup>, Emily Butler<sup>a</sup>, ~~Jihyun~~ ~~ækie~~ Kim<sup>a</sup>, Robert W. Henning<sup>c</sup>, Gregory P. Holland<sup>a\*</sup>, Jeffery L. Yarger<sup>a\*</sup>

<sup>a</sup> *Department of Chemistry and Biochemistry, Magnetic Resonance Research Center,  
Arizona State University, Tempe, Arizona 85287-1604, USA*

<sup>a</sup> *Department of Physics, University of Wisconsin, Milwaukee, WI 53211*

<sup>a</sup> *Center for Advanced Radiation Sources, The University of Chicago, Chicago, IL 60637.*

[\\*jyarger@gmail.com](mailto:*jyarger@gmail.com) and [greg.holland@asu.edu](mailto:greg.holland@asu.edu)

**Supplemental Figure**

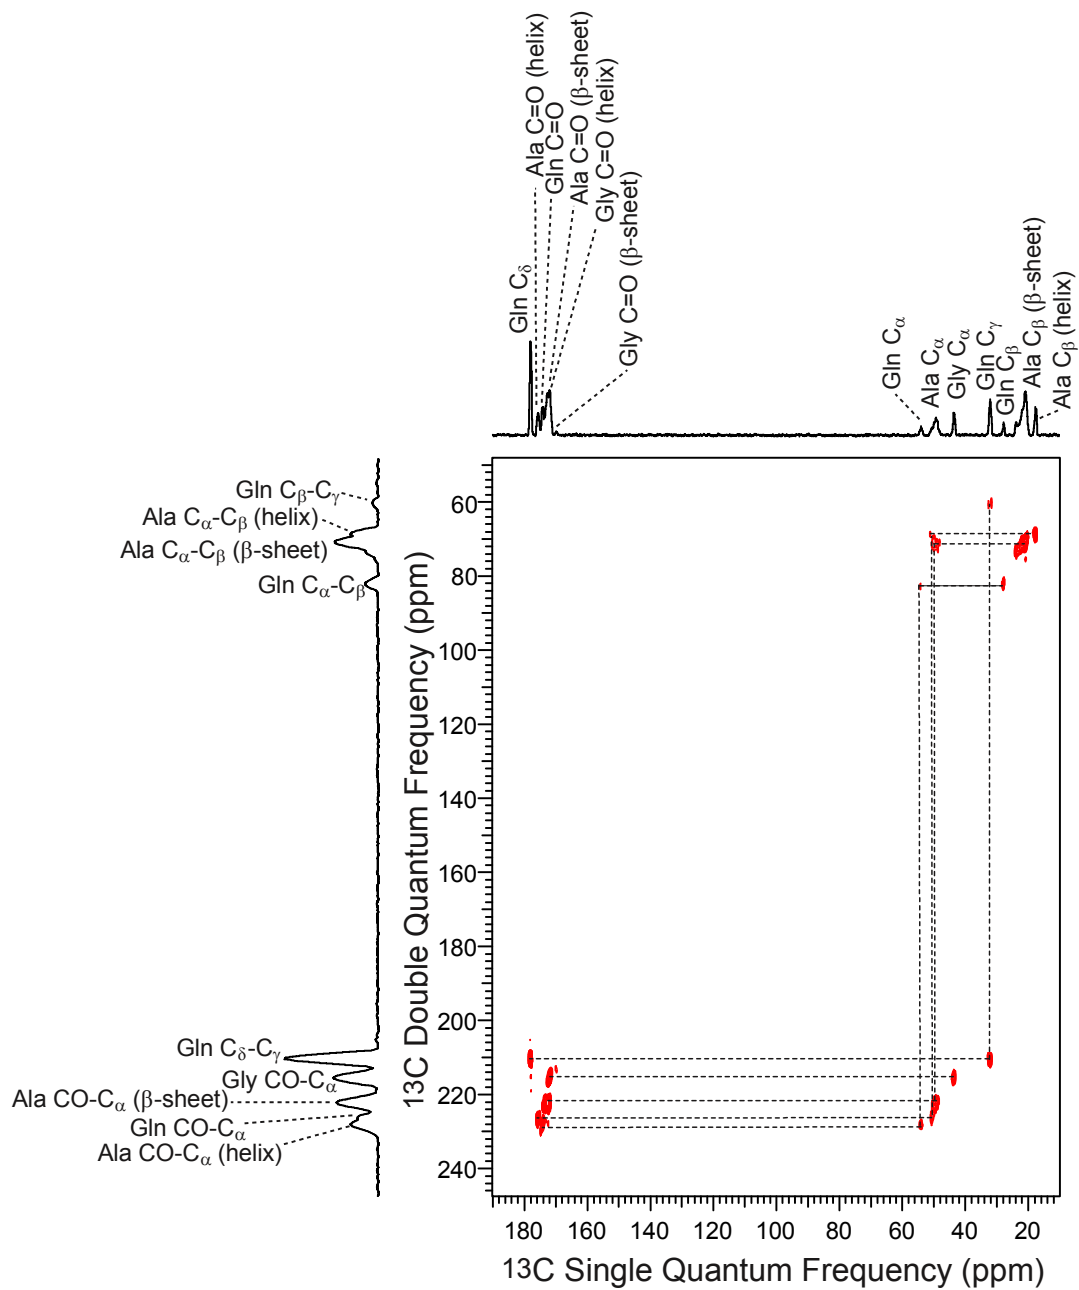

Figure S1. 2D directly polarized  $^{13}\text{C}$ - $^{13}\text{C}$  through-bond DQ/SQ refocused INADEQUATE NMR spectrum of U- $^{13}\text{C}/^{15}\text{N}$ -alanine enriched *Latrodectus hesperus* major silk. Chemical shifts and linewidths were extracted from this experiment to use in fitting the U- $^{13}\text{C}/^{15}\text{N}$ -alanine enriched quantitative  $^{13}\text{C}$  [ $^1\text{H}$ ] DD-MAS data.
